# Supplementary material for: Molecular Signatures Reveal Circadian Clocks May Orchestrate the Homeorhetic Response to Lactation
Source: PLoS One. 2009 Oct 9;4(10):e7395. doi: 10.1371/journal.pone.0007395 (PMC2754660; doi:10.1371/journal.pone.0007395)
Supplement: Table S1 — Expression changes in genes commonly up and down regulated across all three tissues (adjusted P<0.001; common) during the transition from pregnancy to lactation, and changes within mammary, liver and adipose tissues. Values are log base 2 fold change and corresponding adjusted and unadjusted (nominal) p-values. (0.03 MB XLS) [file pone.0007395.s004.xls]

## Sheet: Sheet1
Table S1. Expression changes in genes commonly up and down regulated across all three tissues (adjusted P<0.001; common) during the transition from pregnancy to lactation, and changes within mammary, liver and adipose tissues. Values are log base 2 fold change and corresponding adjusted and unadjusted (nominal) p-values.
			Common			Mammary			liver			adipose
	entrez	symbol	fold_change	adjusted_p	unadjusted_p	fold_change	adjusted_p	unadjusted_p	fold_change	adjusted_p	unadjusted_p	fold_change	adjusted_p	unadjusted_p
DOWN	294228	RT1-S3	-1.21144	1.07605e-06	9.36998e-11	-1.38519	0.000425948	8.11912e-05	-1.02357	0.119373	0.0020059	-1.22557	0.0783697	0.0003412
	246268	Oas1b	-1.59038	7.33509e-06	3.9619e-09	-1.9114	0.00299735	0.000771785	-1.40534	0.264565	0.00972191	-1.45439	0.319767	0.00769576
	286918	Mx2	-1.51889	7.33509e-06	4.47106e-09	-1.74348	0.000872592	0.000187071	-1.27426	0.171934	0.00390992	-1.53891	0.11853	0.000722492
	309526	Ifit3	-1.18242	7.33509e-06	3.33566e-09	-1.00848	0.0147836	0.00494459	-1.24513	0.0667421	0.000784586	-1.29366	0.0968963	0.000531563
	503164	Apol9a	-1.02091	3.92442e-05	2.73384e-08	-1.28467	4.04792e-05	4.9665e-06	-1.17526	0.00537507	1.82539e-05	-0.602779	0.38095	0.0131694
	293624	Irf7	-2.34792	9.20315e-05	8.93604e-08	-3.54591	2.77519e-09	3.26237e-11	-2.17502	0.00046442	5.36945e-07	-1.32284	0.0939232	0.000498895
	304545	Oasl1	-1.54544	9.20315e-05	9.61667e-08	-2.18993	3.76931e-06	3.01637e-07	-1.5877	0.008933	4.20047e-05	-0.858679	0.386356	0.0138513
	301000	Ube1l	-0.463996	0.000115825	1.31115e-07	-0.650901	0.000779636	0.000164356	-0.347489	0.411708	0.0276049	-0.3936	0.386356	0.0136542
	295622	RGD1560210	-0.523883	0.000125032	1.66702e-07	-0.56111	0.111717	0.0528429	-0.61815	0.445186	0.0341527	-0.392388	0.710936	0.168324
	308652	Smox	-0.760902	0.000189658	3.303e-07	-0.919274	0.00173049	0.000411225	-0.726046	0.164616	0.00369827	-0.637386	0.351896	0.00957966
	245955	Lgals3bp	-1.09105	0.000221647	4.96056e-07	-1.73774	8.41432e-05	1.19943e-05	-0.845698	0.327794	0.0151566	-0.689716	0.524897	0.0438649
	306766	LOC306766	-0.875129	0.000221647	4.87574e-07	-1.07029	0.00335234	0.000879593	-1.0668	0.0728078	0.000908185	-0.4883	0.618986	0.100179
	363256	LOC363256	-0.7471	0.000221647	5.01814e-07	-0.717391	0.324596	0.193164	-0.499176	0.877828	0.361405	-1.02473	0.577678	0.0672073
	298693	G1p2	-1.00118	0.000258209	6.50291e-07	-0.714191	0.147758	0.0736732	-1.34477	0.102793	0.00159327	-0.944573	0.443874	0.020466
	305970	Fbxo16	-0.475469	0.000258209	6.97011e-07	-0.697898	0.00350632	0.000926652	-0.315359	0.646178	0.105069	-0.413148	0.50724	0.0367047
	362277	Zfp313	-0.358061	0.000258209	6.39413e-07	-0.355147	0.0684436	0.0293883	-0.376841	0.374559	0.0214789	-0.342196	0.501812	0.035289
	80878	Slc16a3	-0.424959	0.000280799	8.52848e-07	-0.341324	0.315773	0.186456	-0.336762	0.766891	0.192225	-0.596792	0.464297	0.0250783
	362416	Rpusd3	-0.600273	0.000290236	9.09829e-07	-0.958407	5.59762e-05	7.37479e-06	-0.372308	0.469556	0.0416079	-0.470104	0.368638	0.0117487
	311849	Crat	-0.782853	0.000326421	1.08011e-06	-1.12026	0.00128787	0.000294604	-0.863902	0.15976	0.0035057	-0.364402	0.729345	0.189068
	288238	Pigp	-0.49394	0.000330615	1.12278e-06	-0.653536	0.0029745	0.000764606	-0.266507	0.693884	0.134439	-0.561776	0.23372	0.00302631
	114247	Slfn3	-1.41405	0.000339203	1.20552e-06	-1.94648	0.00024817	4.33715e-05	-1.08849	0.280304	0.0113986	-1.20718	0.288596	0.00557273
	366013	Coq4	-0.644996	0.000345788	1.29475e-06	-0.800739	0.00186995	0.000447784	-0.47695	0.400074	0.024874	-0.6573	0.231555	0.00288334
	365592	Pdss2	-0.421392	0.000358597	1.37393e-06	-0.559131	0.0628724	0.0265801	-0.376081	0.681827	0.126462	-0.328964	0.719134	0.179157
	690768	LOC690768	-1.09154	0.000400784	1.60537e-06	-1.47562	0.00333684	0.00087518	-1.1638	0.222559	0.00653104	-0.635213	0.642305	0.1197
	24575	Mx1	-1.44636	0.000422846	1.76868e-06	-1.61982	0.00765062	0.00228972	-1.78524	0.073415	0.000939743	-0.934024	0.574846	0.062973
	360800	Sumf2	-0.580765	0.000491495	2.20461e-06	-0.705221	0.0494163	0.0199348	-0.266165	0.876905	0.359192	-0.770909	0.368462	0.0116789
	362518	RGD1307218	-0.771647	0.000758647	4.02973e-06	-1.1832	2.19952e-05	2.45157e-06	-0.241975	0.802197	0.237042	-0.889763	0.0563319	0.000129594
	314004	Cmpk2	-0.838422	0.000827319	4.68267e-06	-1.3771	1.34322e-05	1.36614e-06	-0.611776	0.27905	0.0110803	-0.526387	0.470987	0.0265761
	299270	Serpina6	-0.48435	0.000972776	5.67537e-06	-0.64149	0.0631218	0.026713	-0.641974	0.408462	0.0266083	-0.169587	0.9027	0.541157
UP	288444	Hsph1	1.35036	1.3109e-06	2.283e-10	1.50571	2.65037e-06	1.94785e-07	1.16102	0.00418598	1.27577e-05	1.38433	0.00317417	8.29199e-07
	309400	Tmem2	1.33675	2.72149e-06	7.10944e-10	1.5768	0.00589026	0.00168389	-0.429034	0.408462	0.0268538	1.44743	0.239231	0.00349129
	83526	Atrn	0.73534	6.69448e-06	2.33176e-09	0.695449	0.00120762	0.000272671	0.842044	0.00629871	2.52299e-05	0.668528	0.0846272	0.000420041
	293938	Bloc1s2	0.744664	4.08969e-05	3.20509e-08	1.02344	0.0020329	0.000494241	0.524997	0.509127	0.0527126	0.685554	0.381947	0.0133701
	282838	Gm2a	0.655388	8.85632e-05	7.71188e-08	0.838553	0.00412083	0.00111633	0.480053	0.489664	0.0466895	0.647559	0.349915	0.00901904
	83472	Ugdh	0.568361	0.000120732	1.47183e-07	0.823524	9.38367e-05	1.36539e-05	0.451583	0.238886	0.00738458	0.429977	0.357433	0.0103063
	362092	Brd3	0.361853	0.000125032	1.742e-07	0.401073	0.00137777	0.000318048	0.411648	0.031745	0.000237728	0.272837	0.351896	0.00929045
	25617	Hspa5	0.68544	0.000144142	2.13376e-07	0.902638	0.00207934	0.000506254	0.43441	0.554329	0.0686329	0.719272	0.251276	0.00402602
	315664	Kdelc2	0.760408	0.000153703	2.54297e-07	0.981089	0.00219445	0.000536778	0.747602	0.212395	0.00590088	0.552532	0.502103	0.0359606
	314212	Daam1	0.532211	0.000153703	2.4273e-07	0.624841	0.0070235	0.00206901	0.51491	0.258821	0.00918387	0.45688	0.436748	0.0192568
	301252	Hsp90ab1	0.598805	0.000191981	3.51062e-07	0.62165	0.0213463	0.00758572	0.578672	0.290604	0.0122224	0.596094	0.355414	0.0100901
	297339	Capg	0.694185	0.000221647	4.93924e-07	0.373331	0.245878	0.136	0.892468	0.0772406	0.00102234	0.816756	0.210818	0.00229205
	308939	Ipo7	0.501147	0.000221647	4.73599e-07	0.598389	0.0125004	0.00407102	0.613654	0.154197	0.00332993	0.291399	0.670923	0.138479
	363229	Slc39a10_predicted	1.10955	0.000258209	6.55784e-07	1.72997	2.7993e-06	2.09708e-07	0.913867	0.0824464	0.00118458	0.68482	0.367227	0.0114567
	306203	Pxk	0.420795	0.000258209	6.87775e-07	0.333895	0.116522	0.0554096	0.464328	0.264565	0.00963658	0.464163	0.351896	0.00965952
	315447	Chordc1	0.610136	0.00026251	7.3148e-07	0.642423	0.00660592	0.00192586	0.719162	0.0601107	0.000660528	0.468822	0.436748	0.0185859
	313840	Fam82a	0.952949	0.000280799	8.55796e-07	1.12219	0.0141024	0.00467255	1.20196	0.141119	0.00269362	0.534708	0.687979	0.15382
	304055	RGD735112	0.399822	0.000280799	8.44089e-07	0.346012	0.0683336	0.0293232	0.449603	0.212108	0.00585495	0.403852	0.374284	0.0121893
	306562	Tacc1	0.730371	0.000318731	1.02691e-06	1.13512	0.00520752	0.00145968	0.452922	0.742673	0.169604	0.603074	0.585555	0.0709905
	260321	Fkbp4	0.845824	0.000339203	1.23013e-06	1.23823	4.35341e-05	5.43229e-06	0.904056	0.0390179	0.00032861	0.395187	0.59656	0.0841358
	89827	Ddx39	0.574741	0.000339203	1.24055e-06	0.787845	0.00027403	4.86441e-05	0.378007	0.419498	0.0288537	0.558371	0.208735	0.00203573
	25379	Anp32a	0.891344	0.000359823	1.40996e-06	1.2712	0.000562569	0.000112817	0.440759	0.687493	0.130447	0.96207	0.208781	0.00205435
	295455	Slc39a8	1.22402	0.000422846	1.8042e-06	1.32967	0.0135123	0.00444643	0.375345	0.888167	0.389451	1.96706	0.0487873	8.91616e-05
	308958	Cdr2	0.419967	0.000422846	1.73854e-06	0.501134	0.209728	0.112023	0.423879	0.752023	0.176087	0.334888	0.794896	0.282126
	373541	Taf9	0.423321	0.000485764	2.11496e-06	0.575275	0.0190799	0.00663907	0.3704	0.555009	0.0693036	0.324289	0.630688	0.109317
	50938	Cdon	0.872548	0.000491495	2.22551e-06	0.566567	0.299495	0.174888	0.769146	0.554939	0.0692422	1.28193	0.245478	0.00389319
	192277	Stip1	0.978052	0.000494574	2.28252e-06	1.66492	7.20308e-08	2.01967e-09	0.574231	0.206667	0.0055608	0.695003	0.153476	0.00110924
	25049	Atxn1	0.982737	0.000530009	2.49221e-06	1.28267	0.000525491	0.000103893	0.889674	0.17492	0.00400591	0.77587	0.361286	0.0106964
	306805	Aspn	0.890646	0.000657777	3.18933e-06	1.2385	0.00128605	0.000294077	0.334617	0.831385	0.272935	1.09883	0.145863	0.00101612
	24852	Tpm4	0.864786	0.000657777	3.24113e-06	1.31404	0.00039877	7.52468e-05	0.560039	0.529175	0.0577855	0.720277	0.418553	0.0167654
	29345	Serpinh1	0.722648	0.000657777	3.26483e-06	1.01201	0.00574582	0.00163435	0.611847	0.47932	0.0439919	0.544084	0.585555	0.0711378
	89807	Angpt1	0.961493	0.000662296	3.34493e-06	1.09367	0.0322867	0.0121876	0.794774	0.536392	0.0614551	0.996032	0.444601	0.0212161
	64192	Qdpr	0.652341	0.000667701	3.43037e-06	0.842449	0.0113889	0.00364954	0.465108	0.624393	0.0905816	0.649466	0.444601	0.0209481
	266759	Hspa4	0.736056	0.000758647	3.99907e-06	1.26691	7.60219e-07	4.15724e-08	0.56569	0.132913	0.00241891	0.37557	0.501812	0.0350664
	81748	Pls3	0.667438	0.000806683	4.35513e-06	1.01207	8.92924e-06	8.38185e-07	0.807244	0.00636026	2.60303e-05	0.182998	0.788668	0.263441
	64536	Esm1	1.45818	0.00081308	4.53127e-06	1.0676	0.094786	0.0434229	1.27451	0.344334	0.0175183	2.03243	0.0840882	0.000395399
	246298	Retsat	0.847635	0.00081308	4.50036e-06	0.520809	0.337748	0.203372	0.802553	0.515967	0.0545441	1.21954	0.277562	0.00499349
	304645	RGD1308221	0.870059	0.000869443	4.9968e-06	0.800849	0.0761004	0.033459	1.15985	0.15006	0.00309684	0.649476	0.590596	0.0803816
