# Supplementary material for: Molecular Signatures Reveal Circadian Clocks May Orchestrate the Homeorhetic Response to Lactation
Source: PLoS One. 2009 Oct 9;4(10):e7395. doi: 10.1371/journal.pone.0007395 (PMC2754660; doi:10.1371/journal.pone.0007395)
Supplement: Table S3 — Changes in expression of genes that enrich the KEGG_PATHWAY:hsa04920:Adipocytokine signaling pathway, selected based on enrichment by 8 genes that were down regulated in liver (p<0.05, unadjusted) during transition from pregnancy to lactation. Values are log base 2 fold change, adjusted and unadjusted (nominal) p-values as calculated across all three tissues (common) and within mammary, liver and adipose tissue. (0.02 MB XLS) [file pone.0007395.s006.xls]

## Sheet: Sheet1
Table S3. Changes in expression of genes that enrich the KEGG_PATHWAY:hsa04920:Adipocytokine signaling pathway, selected based on enrichment by 8 genes that were down regulated in liver (p<0.05, unadjusted) during transition from pregnancy to lactation. Values are log base 2 fold change, adjusted and unadjusted (nominal) p-values as calculated across all three tissues (common) and within mammary,…
		Common			Mammary			liver			adipose
entrez	symbol	fold_change	adjusted_p	unadjusted_p	fold_change	adjusted_p	unadjusted_p	fold_change	adjusted_p	unadjusted_p	fold_change	adjusted_p	unadjusted_p
83516	Ppargc1a	-0.199391	0.0188318	0.0025002	-0.141492	0.467561	0.310364	-0.284068	0.49167	0.0474373	-0.172615	0.761106	0.217941
24536	Lepr	-0.150364	0.0737079	0.0254358	-0.00694132	0.978724	0.956054	-0.372239	0.212395	0.00591837	-0.0719132	0.907319	0.569205
25413	Cpt2	-0.461626	0.00994413	0.000755458	-0.695893	0.0356776	0.0136696	-0.563899	0.469668	0.0418382	-0.125087	0.929554	0.639628
24514	Jak2	-0.0835859	0.533076	0.40742	0.0727979	0.794404	0.670443	-0.447066	0.310861	0.0134263	0.12351	0.888203	0.471681
116554	Mapk8	0.118946	0.533104	0.407488	0.855508	1.88498e-05	2.04518e-06	-0.371626	0.32486	0.0149078	-0.127046	0.844905	0.382358
83803	Prkab1	-1.09163	0.005269	0.00020725	-2.34439	4.82626e-10	3.19397e-12	-0.467445	0.410309	0.0271182	-0.463065	0.477194	0.0284638
25757	Cpt1a	-0.840214	0.0272082	0.00481664	-1.80128	3.22163e-06	2.48552e-07	-1.24258	0.0118805	6.9313e-05	0.523213	0.56681	0.0591081
94340	Acsl5	0.455034	0.0926236	0.0359799	1.43878	1.8291e-06	1.23119e-07	-0.444275	0.458915	0.0382037	0.370601	0.590282	0.0802672
