# Supplementary material for: Molecular Signatures Reveal Circadian Clocks May Orchestrate the Homeorhetic Response to Lactation
Source: PLoS One. 2009 Oct 9;4(10):e7395. doi: 10.1371/journal.pone.0007395 (PMC2754660; doi:10.1371/journal.pone.0007395)
Supplement: Table S4 — Changes in expression of genes that enrich the GOTERM_MF_ALL:GO:0004888∼transmembrane receptor activity, selected based on enrichment by 33 genes that were down regulated in liver (p<0.05, unadjusted) during transition from pregnancy to lactation. Values are log base 2 fold change, adjusted and unadjusted (nominal) p-values as calculated across all three tissues (common) and within mammary, liver and adipose tissue. (0.02 MB XLS) [file pone.0007395.s007.xls]

## Sheet: Sheet1
Table S4. Changes in expression of genes that enrich the GOTERM_MF_ALL:GO:0004888~transmembrane receptor activity, selected based on enrichment by 33 genes that were down regulated in liver (p<0.05, unadjusted) during transition from pregnancy to lactation. Values are log base 2 fold change, adjusted and unadjusted (nominal) p-values as calculated across all three tissues (common) and within mamm…
		Common			Mammary			liver			adipose
entrez	symbol	fold_change	adjusted_p	unadjusted_p	fold_change	adjusted_p	unadjusted_p	fold_change	adjusted_p	unadjusted_p	fold_change	adjusted_p	unadjusted_p
316009	Plxnb1	-0.305089	0.00365026	0.000101935	-0.441315	0.0118021	0.00380557	-0.31239	0.444121	0.0335678	-0.161563	0.787706	0.257281
140473	Ccbp2	-0.167941	0.136413	0.0634195	-0.205213	0.356894	0.217947	-0.399011	0.370386	0.0208239	0.100402	0.902713	0.542401
24536	Lepr	-0.150364	0.0737079	0.0254358	-0.00694132	0.978724	0.956054	-0.372239	0.212395	0.00591837	-0.0719132	0.907319	0.569205
316019	Ccrl2	-0.250728	0.00428505	0.000139551	-0.186656	0.254277	0.142217	-0.348418	0.252279	0.00878393	-0.21711	0.606758	0.0899624
60663	Insrr	-0.150328	0.0898077	0.0342058	-0.0514445	0.780676	0.651107	-0.42109	0.0695409	0.000847765	0.0215495	0.974054	0.849525
171369	Cd40	-0.302564	0.0249688	0.00409189	-0.394895	0.122841	0.0588853	-0.430757	0.464545	0.0405132	-0.08204	0.941431	0.685436
25022	Fgfr2	-0.129516	0.203626	0.110661	-0.0540811	0.827179	0.713445	-0.406271	0.262915	0.00950102	0.0718032	0.925112	0.626178
170945	Chrna2	-0.115208	0.177003	0.0912939	0.0205983	0.929478	0.868533	-0.281515	0.425079	0.0303094	-0.0847079	0.896252	0.497777
24448	Hrh1	-0.0855349	0.370254	0.2479	0.0801157	0.743182	0.603592	-0.333845	0.458915	0.0372294	-0.0028758	0.997602	0.985093
117097	Gpr50	-0.113924	0.089919	0.034256	-0.0800815	0.639732	0.48098	-0.247188	0.456474	0.035941	-0.0145015	0.97926	0.898007
65276	Nmur1	0.0105958	0.948396	0.921391	0.400997	0.0663961	0.0283704	-0.440345	0.341808	0.0169881	0.0711346	0.941431	0.6847
498153	Gpr146	-0.34591	0.0479989	0.0125891	-0.423131	0.2539	0.141888	-0.590452	0.479561	0.0440558	-0.0241458	0.986681	0.931865
24210	Asgr1	-0.128484	0.106315	0.0439689	-0.0994462	0.609523	0.449553	-0.303469	0.408462	0.026697	0.0174633	0.978413	0.893826
59109	Ntrk1	-0.282897	0.122585	0.0540552	-0.0825667	0.872642	0.778187	-0.639274	0.457117	0.0361551	-0.126851	0.936092	0.665497
360406	Ptprf	0.331801	0.235437	0.135329	1.25999	0.00104209	0.00023094	-0.701342	0.404455	0.0258842	0.436759	0.687979	0.153843
300652	Sorl1	-1.3786	0.0135572	0.00142579	-3.19083	1.86925e-08	3.72744e-10	-1.15624	0.117629	0.0019359	0.211268	0.902549	0.53653
303196	Tmem11	-0.313896	0.00752548	0.000447571	-0.39275	0.123617	0.0593759	-0.470551	0.404455	0.0258135	-0.0783867	0.945763	0.697736
81509	Bdkrb1	-0.0582537	0.386887	0.263675	0.0890792	0.602833	0.441784	-0.241754	0.476388	0.043308	-0.0220862	0.974054	0.847988
364754	Fzd8	-0.783702	0.00839953	0.000555873	-1.59657	7.08446e-05	9.74082e-06	-0.643758	0.458915	0.0382269	-0.110773	0.949449	0.710882
81680	Lifr	-0.40567	0.0509155	0.0139442	0.0646365	0.859887	0.759851	-1.14085	0.00324699	8.48222e-06	-0.140795	0.899501	0.50687
24684	Prlr	0.141923	0.743261	0.64415	1.75351	1.08741e-05	1.06407e-06	-0.832936	0.220212	0.00630875	-0.494804	0.606758	0.0901588
116677	F2rl1	-0.0748975	0.329408	0.210857	0.128979	0.437286	0.284561	-0.270329	0.425079	0.0300456	-0.0833422	0.892254	0.486607
29683	Klrc1	-0.116361	0.341964	0.2215	0.10229	0.739831	0.599583	-0.417725	0.460724	0.0388506	-0.0336486	0.975874	0.86258
65032	Htr7	-0.137209	0.076171	0.026694	0.0290746	0.893824	0.811088	-0.339705	0.252279	0.0087912	-0.100998	0.861957	0.409058
29471	Ppyr1	-0.114786	0.172918	0.0884768	0.107865	0.539526	0.377349	-0.304393	0.342896	0.017318	-0.147828	0.767953	0.229196
24938	Grpr	-0.175115	0.0142695	0.00156935	-0.0711262	0.701442	0.55204	-0.295737	0.353409	0.0184952	-0.158482	0.732041	0.190677
360697	Ifngr2	-0.331079	0.00771471	0.000471589	-0.440372	0.023898	0.00863815	-0.510942	0.142101	0.00280887	-0.0419223	0.967181	0.789845
25153	Mas1	-0.0691493	0.326356	0.208149	0.0506105	0.764835	0.631326	-0.271849	0.318749	0.0145719	0.0137907	0.978683	0.895765
245955	Lgals3bp	-1.09105	0.000221647	4.96056e-07	-1.73774	8.41432e-05	1.19943e-05	-0.845698	0.327794	0.0151566	-0.689716	0.524897	0.0438649
301059	Myd88	-0.554405	0.037768	0.00855403	-1.45204	1.88947e-05	2.05334e-06	-0.509492	0.483546	0.0452771	0.298319	0.768641	0.229876
171056	Cx3cr1	-0.0778925	0.352334	0.230962	0.0815259	0.702918	0.553844	-0.337957	0.360058	0.0193134	0.0227538	0.975874	0.868377
365901	Gnat2	-0.35876	0.00280208	5.58756e-05	-0.27334	0.258827	0.145686	-0.501809	0.270793	0.0104224	-0.301131	0.63187	0.110392
84422	Gfra3	-1.2247	0.00567211	0.000256835	-2.60556	2.07973e-09	2.2275e-11	-0.757278	0.176582	0.00415912	-0.311252	0.751855	0.209768
