# Supplementary material for: Molecular Signatures Reveal Circadian Clocks May Orchestrate the Homeorhetic Response to Lactation
Source: PLoS One. 2009 Oct 9;4(10):e7395. doi: 10.1371/journal.pone.0007395 (PMC2754660; doi:10.1371/journal.pone.0007395)
Supplement: Table S6 — Changes in expression of genes that enrich the GOTERM_MF_ALL:GO:0003700∼transcription factor activity, selected based on enrichment by 112 genes that were commonly up regulated in all three tissues (p<0.05, adjusted) during transition from pregnancy to lactation. Values are log base 2 fold change, adjusted and unadjusted (nominal) p-values as calculated across all three tissues (common) and within mammary, liver and adipose tissue. (0.05 MB XLS) [file pone.0007395.s009.xls]

## Sheet: Sheet1
Table S6. Changes in expression of genes that enrich the GOTERM_MF_ALL:GO:0003700~transcription factor activity, selected based on enrichment by 112 genes that were commonly up regulated in all three tissues (p<0.05, adjusted) during transition from pregnancy to lactation. Values are log base 2 fold change, adjusted and unadjusted (nominal) p-values as calculated across all three tissues (common)…
		Common			Mammary			liver			adipose
entrez	symbol	fold_change	adjusted_p	unadjusted_p	fold_change	adjusted_p	unadjusted_p	fold_change	adjusted_p	unadjusted_p	fold_change	adjusted_p	unadjusted_p
362251	Rbm39	0.180549	0.0385127	0.00878641	0.41493	0.00667515	0.00194895	0.0779341	0.939608	0.525604	0.0487836	0.942611	0.690476
360819	Suds3	0.335326	0.0136976	0.00145462	0.693557	9.82078e-05	1.44267e-05	-0.0231188	0.989635	0.862279	0.335539	0.421067	0.0169479
303274	Phf12	0.162812	0.033541	0.0069165	0.270741	0.190863	0.100068	0.0718928	0.96714	0.65492	0.145801	0.835431	0.367424
301570	Sp110	0.700286	0.00749377	0.000445032	1.52399	0.000314766	5.77509e-05	0.14979	0.964107	0.644786	0.427081	0.73607	0.194721
289052	Zbtb41	0.59516	0.0357537	0.00779582	1.43214	0.000845384	0.000180207	0.161856	0.959957	0.62906	0.191483	0.90727	0.568012
316524	Znf142	0.231012	0.013548	0.00141921	0.0229543	0.942152	0.891598	0.362933	0.458915	0.0383716	0.307149	0.589243	0.0764636
84584	Ncoa3	0.235586	0.0197504	0.00272936	0.221598	0.319126	0.18888	0.25238	0.698644	0.136334	0.232782	0.710685	0.168203
29685	Mcm6	0.803638	0.0454476	0.0115044	2.22785	3.21111e-07	1.39808e-08	-0.289346	0.854639	0.312861	0.472415	0.626445	0.104539
252962	Phtf1	0.452028	0.00420461	0.000135101	0.809971	0.00192848	0.000464488	0.120465	0.949106	0.559754	0.425647	0.528084	0.0463398
170909	Erg	0.607082	0.0108711	0.000911133	1.00745	0.0124978	0.00406906	0.0341736	0.994694	0.916134	0.779621	0.453702	0.0221306
287441	Zbtb4	0.205656	0.0415559	0.0100271	0.245047	0.258982	0.145796	0.166322	0.857224	0.318496	0.2056	0.762953	0.219704
297867	Arid1a	0.32661	0.00367251	0.000103505	0.236189	0.388134	0.243141	0.281745	0.737053	0.166013	0.461896	0.47683	0.0271964
314988	Zhx2	0.28157	0.0123904	0.00118632	0.424439	0.0216257	0.00770946	0.392963	0.299944	0.0128317	0.0273071	0.975296	0.854661
287710	Ptrf	0.626468	0.0327837	0.00664581	1.68728	4.19121e-05	5.1715e-06	-0.0421117	0.991874	0.88923	0.234232	0.875614	0.440939
81808	Nr2f1	0.559291	0.0461918	0.011802	1.16062	0.0255693	0.00934467	0.172894	0.971574	0.680449	0.344362	0.865321	0.41418
25496	Notch1	0.287722	0.0337919	0.00699437	0.55999	0.0146816	0.00490408	0.322479	0.619185	0.0892901	-0.0193029	0.984559	0.916809
499497	Mef2c	1.00038	0.0203625	0.00287921	2.22463	0.000983176	0.000215858	0.537535	0.854639	0.312773	0.238986	0.932192	0.65115
288651	Gtf2h3	0.304809	0.041833	0.0101268	0.748498	0.000225097	3.86334e-05	-0.07379	0.961004	0.633529	0.239721	0.654167	0.12868
298400	Creb3	0.164448	0.0357397	0.00778032	0.112134	0.644606	0.4857	0.0621218	0.97365	0.698444	0.319089	0.553653	0.054189
300772	Pias1	0.197236	0.0250275	0.00410805	0.309949	0.0803006	0.0357171	0.0287983	0.989635	0.838958	0.25296	0.594466	0.0824603
171159	Zhx1	0.211711	0.0284577	0.00520139	0.460542	0.00684315	0.00200539	0.142919	0.846549	0.298891	0.0316728	0.97191	0.816227
25337	Nfyc	0.240769	0.0276463	0.00492731	0.521243	0.00056953	0.000114313	0.164822	0.737865	0.166797	0.0362426	0.958165	0.757204
83726	Ctcf	0.360626	0.0199585	0.0027807	0.87923	3.78495e-06	3.04938e-07	0.0597648	0.965655	0.652431	0.142882	0.797702	0.285747
310399	Narg1	0.41483	0.00411501	0.000125772	0.750164	3.13074e-05	3.6667e-06	0.334391	0.33244	0.0159522	0.159936	0.768641	0.229796
81817	Usf2	0.276595	0.00624622	0.00031123	0.452834	0.0338403	0.0128851	0.209602	0.794743	0.228786	0.16735	0.81811	0.334302
368070	Pnn	0.33878	0.0314004	0.00621226	0.584756	0.059935	0.0251243	0.522387	0.476685	0.0435425	-0.0908024	0.949739	0.715893
89809	Rfc1	0.208602	0.0110945	0.000940965	0.152213	0.309027	0.1818	0.291186	0.315823	0.0141081	0.182409	0.6334	0.112037
292082	Tcf25	0.492639	0.0254547	0.00423358	1.221	1.08912e-06	6.52485e-08	-0.140489	0.896096	0.408253	0.39741	0.464297	0.0247077
619385	Ncoa4	0.327566	0.0249101	0.00406926	0.742478	0.000584678	0.000117964	-0.00836991	0.997438	0.960094	0.248588	0.677288	0.145054
64441	Hsf2	0.454174	0.0326284	0.00656682	1.16952	5.35445e-06	4.56462e-07	0.378935	0.475337	0.0430882	-0.185929	0.803342	0.307179
293684	Scyl1	0.365663	0.0480507	0.0126236	0.919573	0.000437014	8.37191e-05	-0.113411	0.953192	0.574621	0.290826	0.690219	0.156507
303836	Bcl6	0.826411	0.013548	0.00141109	0.573786	0.138836	0.0682574	1.783	0.00139064	2.54297e-06	0.122448	0.942225	0.688646
315532	Fli1	0.467439	0.0486873	0.012918	0.963429	0.0324686	0.0122732	0.144357	0.973294	0.691135	0.29453	0.867786	0.419687
117140	Hivep1	0.275721	0.00790721	0.000489881	0.349304	0.0996548	0.0461047	0.201422	0.802983	0.238719	0.276436	0.630688	0.109712
314374	Foxn3	0.416198	0.0198163	0.00274536	1.01778	9.33805e-07	5.31851e-08	0.0557889	0.973294	0.688974	0.175022	0.757414	0.215047
303132	Aff4	0.287531	0.0334306	0.00688466	0.729211	1.78442e-05	1.91898e-06	0.114896	0.872632	0.352537	0.018485	0.97657	0.880186
65035	Nr1i3	0.301723	0.0132099	0.0013397	0.394138	0.061467	0.0258414	0.395643	0.401972	0.0253284	0.115389	0.895579	0.496218
79255	Atf4	0.421866	0.0284091	0.0051826	1.10419	1.23632e-05	1.23696e-06	0.123509	0.931415	0.496107	0.0378949	0.974048	0.833952
313905	Supt7l	0.350269	0.0293563	0.00550668	0.880218	8.42949e-05	1.20233e-05	-0.0159958	0.995213	0.923678	0.186584	0.788668	0.269128
303753	Foxk2	0.777267	0.0291823	0.00541768	2.11058	1.04578e-10	4.09786e-13	-0.0932456	0.95345	0.577049	0.314469	0.578979	0.0674567
361652	Srcap	0.252566	0.0123904	0.00118695	0.523979	0.000347416	6.46187e-05	0.143898	0.776077	0.2074	0.0898204	0.870119	0.427218
54267	Maf	0.198332	0.027096	0.00475902	0.248914	0.11496	0.054568	0.0544688	0.969369	0.66387	0.291614	0.470987	0.0260455
360631	Mlx	0.310341	0.0424416	0.010385	0.862364	0.000127342	1.97268e-05	0.0833616	0.959252	0.623373	-0.0147026	0.986537	0.930832
298686	Ccnl2	0.262335	0.0429704	0.010572	0.266257	0.495599	0.336035	0.200633	0.922277	0.466875	0.320114	0.783397	0.249187
304947	Pbx1	0.649284	0.0109942	0.000925758	1.4221	1.29427e-05	1.30509e-06	0.110836	0.961218	0.635688	0.41492	0.595664	0.0838806
24918	Stat5a	0.816875	0.00636607	0.00033316	1.66432	9.40968e-06	8.90659e-07	0.68665	0.325039	0.014959	0.0996569	0.948982	0.709307
317627	Baz2b	0.499367	0.00233076	3.64305e-05	0.810712	0.000567046	0.000113765	0.347179	0.543567	0.0647324	0.34021	0.585555	0.069957
305455	Whsc2	0.278086	0.0411199	0.00985389	0.711768	4.31064e-05	5.37141e-06	0.199679	0.681715	0.126382	-0.0771901	0.903752	0.54732
298648	Tardbp	0.315941	0.0021998	3.08401e-05	0.460783	0.00541788	0.00152667	0.192892	0.717885	0.152216	0.294149	0.490721	0.0329387
362342	Hipk2	1.31168	0.00108745	6.53378e-06	2.126	4.96311e-06	4.18347e-07	0.61373	0.553318	0.0680807	1.19532	0.143872	0.000952132
362165	Creb3l1	0.463732	0.0396733	0.00922048	1.00531	0.00309419	0.00080157	-0.244988	0.882087	0.367002	0.630872	0.467054	0.0254763
300095	Srebf2	1.02035	0.0054149	0.000225531	2.19079	1.74415e-08	3.34129e-10	0.323649	0.745311	0.171559	0.546609	0.464297	0.0249765
365755	Tbl1xr1	0.416619	0.0254864	0.00424346	0.966485	0.000114342	1.73046e-05	0.281872	0.70603	0.141772	0.0015005	0.998985	0.993634
171068	Pou2f1	0.372131	0.0217461	0.00321913	0.601098	0.107859	0.0507783	0.510407	0.628288	0.0940463	0.00488924	0.997892	0.986866
60331	Atxn3	0.662933	0.0268669	0.00466811	1.50556	0.000275772	4.90358e-05	0.0359927	0.993401	0.909424	0.447248	0.705669	0.164877
114121	Ccnl1	0.54845	0.0028499	6.30333e-05	0.939232	0.00498172	0.00138685	0.462293	0.62473	0.0913197	0.243826	0.833066	0.364158
252855	Sfpq	0.359215	0.0176054	0.00223823	0.451593	0.233359	0.127449	0.164401	0.952704	0.571882	0.461652	0.642072	0.119533
24356	Ets1	0.335136	0.044842	0.0112641	0.855602	9.44251e-05	1.37779e-05	0.0880095	0.957981	0.592112	0.0617958	0.947835	0.706398
54244	Crebbp	0.358143	0.00666749	0.000360546	0.749924	1.72892e-06	1.14268e-07	0.116694	0.832726	0.280195	0.207812	0.56681	0.0599631
170820	Prdm4	0.250938	0.0219367	0.00327486	0.488102	0.013558	0.00446502	0.174397	0.832622	0.278211	0.0903137	0.907729	0.5714
311872	Zbtb43	0.20108	0.0104368	0.000847923	0.302282	0.0741229	0.0324143	0.13048	0.86464	0.339306	0.170477	0.756869	0.214525
314205	Arid4a	0.529818	0.0298634	0.00567156	1.40089	1.36743e-05	1.39434e-06	0.0619793	0.984248	0.788537	0.126583	0.912164	0.584629
29657	Arntl	1.45274	0.00282514	5.93947e-05	2.12618	0.000643754	0.000131901	1.30075	0.280054	0.0112905	0.931308	0.571504	0.062163
317256	Taf1	0.96435	0.00202377	2.40994e-05	1.77572	8.45947e-08	2.50455e-09	0.277912	0.76449	0.18785	0.839417	0.0783697	0.000346778
307498	Pura	0.297517	0.0448366	0.0112521	0.817392	1.0252e-05	9.87352e-07	0.110454	0.894751	0.405504	-0.035296	0.967181	0.78921
366980	Arid2	0.265643	0.0258445	0.00437943	0.57249	0.00317069	0.000823871	0.213308	0.74651	0.173114	0.0111294	0.98918	0.942362
360581	Tada2l	0.206544	0.0122528	0.00115843	0.228311	0.278298	0.159748	0.224679	0.737248	0.166258	0.166642	0.803342	0.300754
497991	Med1	0.481996	0.0168676	0.00208477	1.08249	8.17469e-05	1.15744e-05	0.0114368	0.997438	0.955463	0.352062	0.61329	0.0939078
64635	Snd1	0.508287	0.01634	0.00197492	1.13276	7.17491e-05	9.88394e-06	0.0689895	0.980364	0.745069	0.32311	0.66603	0.135384
310784	Taf13	0.4262	0.025218	0.00415689	1.11563	1.18464e-07	3.87865e-09	0.0385824	0.983523	0.772445	0.124386	0.827876	0.354616
299905	Med30	0.491293	0.0136976	0.00145535	0.721784	0.100108	0.0463669	0.677245	0.535527	0.0605252	0.0748508	0.973673	0.830353
282840	Atf5	0.764289	0.00192206	2.07536e-05	1.32821	0.000265285	4.68246e-05	0.6496	0.404455	0.0257402	0.315061	0.788668	0.26275
363243	Klf7	0.541662	0.00596963	0.000279144	0.778689	0.028909	0.0107465	0.200463	0.927559	0.487159	0.645833	0.490117	0.0312801
406164	Pbx2	0.511452	0.0482353	0.012688	1.40588	7.57874e-06	6.87292e-07	-0.216592	0.862695	0.333548	0.345071	0.65343	0.128251
306873	Rreb1	0.252914	0.00331972	8.59085e-05	0.424208	0.000669511	0.000137878	0.117405	0.797328	0.231409	0.217127	0.490721	0.0316879
25336	Nfyb	0.58009	0.013548	0.00141732	1.40208	1.69317e-07	6.01543e-09	0.153709	0.883751	0.372924	0.184485	0.797702	0.28641
294071	Hells	0.887765	0.0423927	0.0103646	2.09202	0.000537969	0.000107041	0.20213	0.969369	0.666063	0.369142	0.87206	0.43244
29560	Hif1a	0.599461	0.0477006	0.0124442	1.71087	2.13246e-05	2.3602e-06	0.0390797	0.992054	0.89334	0.0484339	0.975874	0.868033
117855	Sf1	0.67627	0.00753405	0.000448761	1.47641	1.08889e-07	3.44241e-09	0.0327292	0.989635	0.852016	0.51967	0.288596	0.0058063
81647	Atf2	0.373284	0.02095	0.00300637	0.80068	0.0120802	0.00390786	0.0792361	0.98155	0.757655	0.239935	0.827855	0.353515
311163	Ctnnd1	0.451363	0.011511	0.00101438	0.947938	2.49847e-05	2.83917e-06	-0.00359465	0.997897	0.982445	0.409746	0.425083	0.0173601
314246	Zbtb1	0.464208	0.0123904	0.00119503	1.04034	0.000134325	2.09956e-05	0.16458	0.898655	0.425352	0.1877	0.833066	0.3641
309457	Pcgf6	0.296699	0.00857588	0.000574131	0.155254	0.604478	0.443621	0.31231	0.686253	0.129315	0.422533	0.524897	0.0435534
306254	Pbrm1	0.292052	0.047546	0.0123668	0.782662	6.59446e-05	8.91205e-06	0.126537	0.88718	0.387508	-0.0330427	0.97191	0.820344
309638	Taf11	0.415403	0.0105038	0.00085611	0.916171	0.000124911	1.92732e-05	0.252271	0.739266	0.16765	0.0777673	0.936092	0.665633
373541	Taf9	0.423321	0.000485764	2.11496e-06	0.575275	0.0190799	0.00663907	0.3704	0.555009	0.0693036	0.324289	0.630688	0.109317
362229	Xrn2	0.37774	0.037655	0.00845958	0.901849	0.00426521	0.00116027	0.116554	0.964107	0.643322	0.114818	0.931939	0.648254
116543	Ebf1	0.359876	0.0047485	0.000170118	0.509531	0.0382249	0.0148225	0.116408	0.94874	0.557476	0.45369	0.47707	0.0283094
362325	Mdfic	0.711183	0.00273939	5.391e-05	1.1979	0.000417219	7.93821e-05	0.469054	0.59112	0.0810191	0.466594	0.594466	0.0825384
367909	Tceal8	0.753861	0.0304259	0.0058711	2.05272	4.758e-09	6.723e-11	0.128716	0.939933	0.526529	0.080149	0.943172	0.692664
367832	Zfx	0.465178	0.0313998	0.0061835	1.07952	0.000397152	7.4907e-05	0.458383	0.529919	0.058574	-0.142368	0.903212	0.545028
252891	Sra1	0.210689	0.0491285	0.0131292	0.388816	0.0455792	0.0181102	-0.057444	0.975658	0.71332	0.300696	0.571504	0.0622563
54299	Ncor1	0.250943	0.0152425	0.00175841	0.150139	0.559412	0.395836	0.42792	0.368972	0.0204985	0.174769	0.810488	0.324091
64622	Adnp	0.203649	0.0269846	0.00472537	0.455154	0.00197989	0.000479457	0.0873146	0.914603	0.454176	0.0684779	0.905171	0.556425
294236	Gtf2h4	0.227941	0.0195137	0.00265352	0.203133	0.405695	0.257569	0.349318	0.525036	0.0568052	0.131371	0.885145	0.461002
290669	Gatad2a	0.259732	0.00969535	0.000718455	0.416308	0.0310452	0.0116487	0.0557299	0.976337	0.720348	0.307157	0.559914	0.0561769
81524	Nfix	0.397782	0.033883	0.00702634	0.70132	0.0469919	0.018783	0.060737	0.989635	0.830409	0.431287	0.666594	0.136077
84481	Arid4b	0.44072	0.0218334	0.00324134	1.0889	0.000238225	4.12978e-05	0.201755	0.885359	0.375094	0.0315012	0.978413	0.889079
313128	Casp8ap2	0.416813	0.0335415	0.00692209	0.948754	0.000389334	7.32968e-05	0.422586	0.492225	0.047596	-0.120902	0.905171	0.557911
313929	Ncoa1	0.372402	0.00253388	4.47908e-05	0.597511	0.000813807	0.000172626	0.250048	0.589612	0.0803211	0.269646	0.5677	0.0604272
361783	Zfp57	0.345976	0.0132803	0.00135763	0.583952	0.0527331	0.0215129	0.177909	0.920906	0.464075	0.276066	0.788048	0.259153
301038	Ubp1	0.292106	0.03375	0.00698276	0.332908	0.435293	0.282766	0.408569	0.766891	0.189738	0.13484	0.934507	0.660709
25562	Tceb3	0.718249	0.0017995	1.70799e-05	1.19654	0.000246664	4.30652e-05	0.504796	0.501627	0.0503514	0.453414	0.589243	0.0768389
305851	Supt16h	0.460968	0.00465203	0.000164061	0.920804	6.30014e-05	8.44297e-06	0.221567	0.773302	0.200461	0.240533	0.707354	0.16569
81516	Smad7	0.142689	0.0449486	0.0113084	0.171078	0.279067	0.160262	0.041039	0.977782	0.73185	0.215949	0.590282	0.0793765
60447	Clock	0.21464	0.0138044	0.00147446	0.30815	0.0578057	0.0240807	0.098224	0.914038	0.453192	0.237547	0.589243	0.0765243
25492	Nfia	0.676434	0.00178992	1.62314e-05	1.09308	6.04026e-06	5.29654e-07	0.174445	0.85227	0.309486	0.761773	0.0549343	0.000105238
360817	Med13l	0.605178	0.00284116	6.25926e-05	1.10416	7.71843e-05	1.08059e-05	0.374555	0.588634	0.0799095	0.336818	0.633782	0.113412
365894	Trim33	0.492269	0.00668408	0.000364353	0.989489	4.2942e-05	5.34169e-06	0.196085	0.831474	0.274986	0.291234	0.630688	0.109409
312299	Ezh2	0.877639	0.00519302	0.000201679	1.81828	3.62942e-08	8.69114e-10	0.488655	0.373815	0.0213357	0.325979	0.636349	0.114845
289307	Tfb2m	0.256222	0.0491285	0.0131076	0.184019	0.524707	0.36374	0.554021	0.264565	0.00965944	0.0306256	0.97657	0.878967
299180	Med6	0.385665	0.00243548	3.99408e-05	0.619143	0.000672984	0.000138652	0.218172	0.687656	0.130788	0.31968	0.487199	0.0304109
