# Supplementary material for: Molecular Signatures Reveal Circadian Clocks May Orchestrate the Homeorhetic Response to Lactation
Source: PLoS One. 2009 Oct 9;4(10):e7395. doi: 10.1371/journal.pone.0007395 (PMC2754660; doi:10.1371/journal.pone.0007395)
Supplement: Table S9 — Changes in expression of genes that enrich the GOTERM_BP_ALL:GO:0050953∼sensory perception of light stimulus, selected based on enrichment by 24 genes that were commonly down regulated in all three tissues (p<0.05, unadjusted) during transition from pregnancy to lactation. Values are log base 2 fold change, adjusted and unadjusted (nominal) p-values as calculated across all three tissues (common) and within mammary, liver and adipose tissue. (0.02 MB XLS) [file pone.0007395.s012.xls]

## Sheet: Sheet1
Table S9. Changes in expression of genes that enrich the GOTERM_BP_ALL:GO:0050953~sensory perception of light stimulus, selected based on enrichment by 24 genes that were commonly down regulated in all three tissues (p<0.05, unadjusted) during transition from pregnancy to lactation. Values are log base 2 fold change, adjusted and unadjusted (nominal) p-values as calculated across all three tissue…
		Common			Mammary			liver			adipose
entrez	symbol	fold_change	adjusted_p	unadjusted_p	fold_change	adjusted_p	unadjusted_p	fold_change	adjusted_p	unadjusted_p	fold_change	adjusted_p	unadjusted_p
25703	Rbp4	-0.564933	0.0208689	0.00298569	-1.31754	0.00933922	0.00289594	-0.171542	0.970485	0.673791	-0.205719	0.920022	0.613938
29402	Unc119	-0.492866	0.030192	0.0058149	-1.30915	5.74668e-06	5.01909e-07	-0.0937538	0.964107	0.644822	-0.0756992	0.949053	0.709558
60395	Trpc3	-0.585794	0.0429704	0.0105742	-0.881072	0.31249	0.184245	0.0984357	0.991068	0.880175	-0.974745	0.676432	0.14325
303741	Fscn2	-0.293027	0.00195553	2.12854e-05	-0.26697	0.0958776	0.0440149	-0.231013	0.585808	0.0786586	-0.381098	0.288596	0.00549089
361930	Bbs7	-0.576861	0.0246471	0.00398551	-1.40332	0.000328793	6.06682e-05	0.0562337	0.989635	0.851236	-0.383499	0.748011	0.20739
64471	Plekhb1	-0.756151	0.057389	0.0171617	-1.78143	5.97136e-06	5.22665e-07	0.739943	0.285562	0.0117865	-1.22696	0.0560372	0.000120312
58983	Rabggta	-0.566319	0.0537562	0.015274	-1.73026	1.01803e-10	3.9005e-13	0.0768489	0.953192	0.57425	-0.0455469	0.954066	0.738684
114638	Hps1	-0.480182	0.0386216	0.00883144	-1.30681	8.93316e-07	5.03287e-08	-0.25795	0.722988	0.155327	0.124214	0.892682	0.487647
192223	Opn4	-0.111713	0.0616146	0.0192023	-0.182955	0.281822	0.16231	-0.082803	0.938737	0.521199	-0.0693826	0.913274	0.590488
60357	Prom1	-1.23647	0.0106437	0.000875852	-2.81097	4.07173e-07	1.89333e-08	-0.398778	0.832622	0.278498	-0.49966	0.716138	0.177101
25480	Mip	-0.161793	0.0738512	0.0255045	0.0618761	0.881226	0.791063	-0.338546	0.722988	0.154574	-0.208709	0.840906	0.374688
83686	Cngb1	-0.185157	0.0203619	0.00287414	-0.0922613	0.71891	0.572173	-0.275978	0.636743	0.0984746	-0.187231	0.787706	0.255932
363143	Gnat1	-0.638115	0.011252	0.000967153	-0.262409	0.185233	0.0963748	-1.49215	6.74932e-07	1.76315e-10	-0.159787	0.803342	0.303656
64572	Vax2	-0.189128	0.0984936	0.0394866	0.110543	0.731185	0.588692	-0.225299	0.831474	0.27442	-0.452627	0.491002	0.0333064
116487	Tgfbi	-0.623374	0.0645264	0.0206885	-1.91374	9.50489e-07	5.4543e-08	0.0504692	0.989635	0.847332	-0.00685276	0.997602	0.979138
309377	Sfrp5	-0.119904	0.0808766	0.0295224	-0.188834	0.314711	0.185774	-0.161594	0.819096	0.255486	-0.00928326	0.989719	0.947293
81523	Myoc	-0.36226	0.0771694	0.0272821	-0.20849	0.818444	0.702368	-0.149618	0.984248	0.783776	-0.728672	0.728817	0.188137
29481	Rgs9	-0.288047	0.0049308	0.000187202	-0.175233	0.375453	0.232418	-0.211561	0.717522	0.151762	-0.477345	0.218525	0.0024978
494343	Tacstd2	-0.295896	0.0114282	0.000999119	-0.601	0.00019402	3.22184e-05	-0.045291	0.975658	0.71158	-0.241396	0.56123	0.0564455
64315	Cd151	-0.162657	0.0810165	0.0295946	-0.168615	0.480656	0.321651	0.0404511	0.98869	0.81049	-0.359806	0.523106	0.0401594
361694	Pitpnm1	-0.33104	0.048957	0.0130407	-0.90542	6.88277e-05	9.3856e-06	-0.0648341	0.974056	0.701352	-0.0228652	0.978413	0.892289
85257	Cnga3	-0.139436	0.0816104	0.0298897	-0.0541054	0.83123	0.718967	-0.105905	0.926789	0.482682	-0.258297	0.61329	0.0937848
365901	Gnat2	-0.35876	0.00280208	5.58756e-05	-0.27334	0.258827	0.145686	-0.501809	0.270793	0.0104224	-0.301131	0.63187	0.110392
245919	Impg2	-0.191016	0.0541989	0.0155366	0.0281001	0.936042	0.880516	-0.175386	0.872632	0.351889	-0.425761	0.48416	0.0293008
